# Supplementary material for: Bone erosions and joint damage caused by chikungunya virus: a systematic review
Source: PubMed Central journal article supplement (PMC11000508; doi:10.1590/0037-8682-0433-2023), 2024-04-05
Supplement: 1678-9849-rsbmt-57-e00404-2024-supp1.pdf [file 1678-9849-rsbmt-57-e00404-2024-supp1.pdf]

S1\_Table. Search strategies

| Search Date   | Data base            | Strategy used                                                                                                                                                                                 | Number of Studies                                                                                                                                                                                                                                                                                                                                                                                                                                                                                                                                                                |
|---------------|----------------------|-----------------------------------------------------------------------------------------------------------------------------------------------------------------------------------------------|----------------------------------------------------------------------------------------------------------------------------------------------------------------------------------------------------------------------------------------------------------------------------------------------------------------------------------------------------------------------------------------------------------------------------------------------------------------------------------------------------------------------------------------------------------------------------------|
| June 06, 2023 | MEDLINE (PubMed)     | ("Chikungunya Fever"[Mesh] OR "Chikungunya Virus Infection" OR "Chikungunya Fever" OR "Chikungunya virus"[Mesh] OR "Chikungunya" OR "CHIK" OR "CHIKV") AND ("Bone erosion" OR "Joint damage") | Chikungunya fever [Mesh]+ bone erosion = 0<br>Chikungunya fever [Mesh]+ joint damage = 1<br><br>Chikungunya fever + joint damage = 1<br>Chikungunya fever + bone erosion= 0<br><br>Chikungunya Virus Infection + bone erosion = 1<br>Chikungunya Virus Infection + joint damage = 1<br><br>Chikungunya virus [Mesh]+ bone erosion = 0<br>Chikungunya fever [Mesh]+ joint damage = 1<br><br>Chikungunya + joint damage = 1<br>Chikungunya + bone erosion = 0<br><br>Chik + joint damage = 0<br>Chik + bone erosion = 0<br><br>Chikv+ joint damage = 1<br>Chikv + bone erosion = 0 |
| June 06, 2023 | The Cochrane Library | # 1- MeSH descriptor: [Chikungunya Fever] explodes all trees<br># 2- MeSH descriptor: [Chikungunya virus] explodes all trees<br>#3- #1 AND #2                                                 | 1- 52<br>2- 18<br>3- 70                                                                                                                                                                                                                                                                                                                                                                                                                                                                                                                                                          |
| June 06, 2023 | SCOPUS               | (( TITLE-ABS-KEY ( "Chikungunya Fever" ) OR TITLE-ABS-KEY ( "Chikungunya virus" ) )) AND (( TITLE-ABS-KEY ( " Bone erosion " ) OR TITLE-ABS-KEY ( "Joint damage" ) ))                         | Chikungunya virus + bone erosion = 8<br>Chikungunya fever + bone erosion = 5<br>Chikungunya fever + Joint damage = 5<br>Chikungunya virus + Joint damage = 5                                                                                                                                                                                                                                                                                                                                                                                                                     |

|               |        |                                                                                                                                                                                                                                              |        |
|---------------|--------|----------------------------------------------------------------------------------------------------------------------------------------------------------------------------------------------------------------------------------------------|--------|
| June 06, 2023 | EMBASE | ('chikungunya'/exp OR 'chikungunya') AND ('bone erosion'/exp OR 'bone erosion' OR (('bone'/exp OR bone) AND ('erosion'/exp OR erosion))) OR ('chikungunya'/exp OR 'chikungunya') AND ('joint damage' OR (('joint'/exp OR joint) AND damage)) | 11 + 7 |
|---------------|--------|----------------------------------------------------------------------------------------------------------------------------------------------------------------------------------------------------------------------------------------------|--------|
